# Supplementary material
Source: publisher figshare collection journal article supplement (https://acs.figshare.com/ndownloader/files/9231784)
Supplement: Supplementary file 1 [file 9231784]

## Supporting Information

### **Co<sub>3</sub>O<sub>4</sub>@(Fe-doped)Co(OH)<sub>2</sub> Microfibers: Facile Synthesis, Oriented-assembly, Formation Mechanism and High Electrocatalytic Activity**

Yao Zhou,<sup>\*</sup> Yijin Wu, Pengfang Zhang, Jiande Chen and Jun-Tao Li<sup>\*</sup>

*College of Energy, Xiamen University, Xiamen, 361005, China.*

E-mail: zhouy@xmu.edu.cn; jtli@xmu.edu.cn

## Contents

|                     |                      |                        |
|---------------------|----------------------|------------------------|
| <b>Section 3.1:</b> | <b>Figures S1-S2</b> | <b>Page S2</b>         |
| <b>Section 3.2:</b> | <b>Figure S3</b>     | <b>Page S3</b>         |
| <b>Section 3.4:</b> | <b>Figures S4-S5</b> | <b>Page S3-Page S4</b> |
| <b>Section 3.5:</b> | <b>Figures S6-S7</b> | <b>Page S5</b>         |

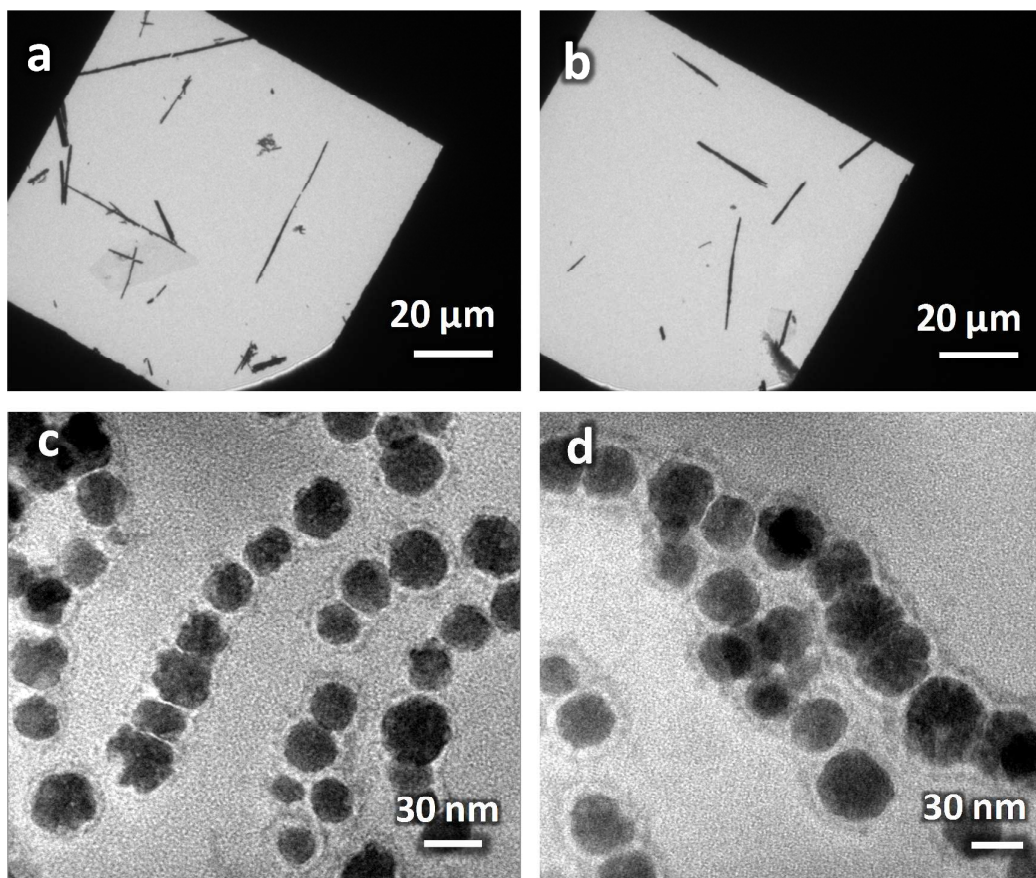

**Figure S1.** (a,b,c,d) TEM images of one dimensional assembly of Co<sub>3</sub>O<sub>4</sub> nanoparticles (with different magnifications).

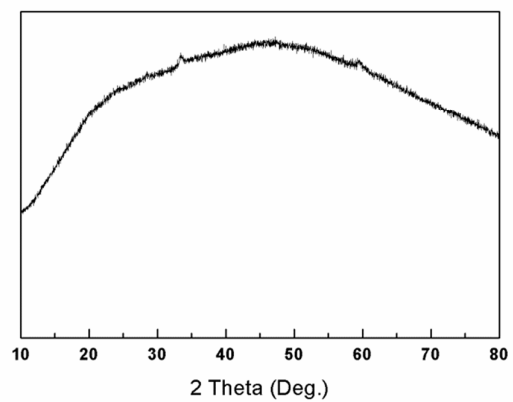

**Figure S2.** XRD pattern of the chain-like assemblage of Co<sub>3</sub>O<sub>4</sub> NPs which indicates very poor crystallinity. Only two weak peaks at 33.3° and 59.5° could be identified, which are ascribed to α-Co(OH)<sub>2</sub> and Co<sub>3</sub>O<sub>4</sub> nanocrystals, respectively.

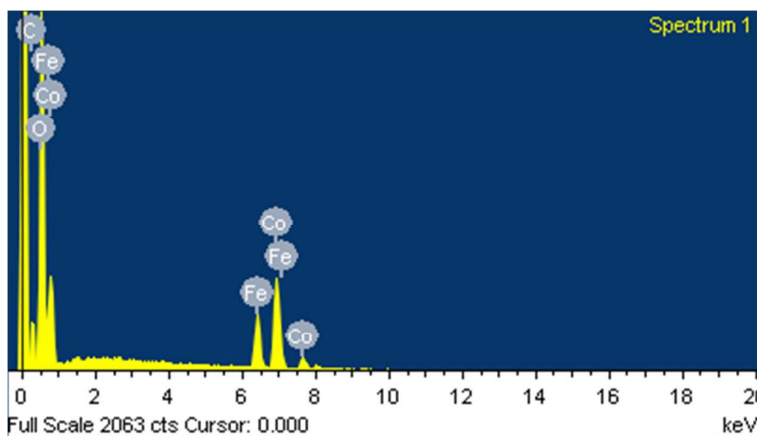

**Figure S3.** EDX spectrum of the  $\text{Co}_3\text{O}_4@\text{Fe-Co(OH)}_2$ , which shows the presence of Co, Fe and O elements.

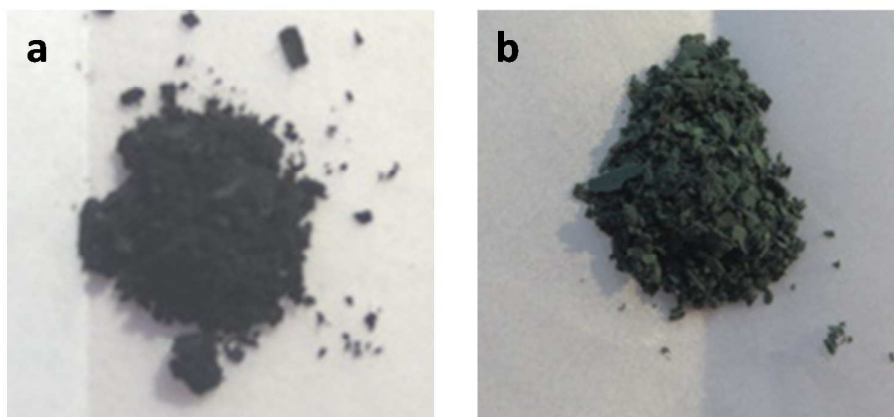

**Fig. S4.** A control experiment to demonstrate the role of SDBS in the formation of the chain-like assemblages of  $\text{Co}_3\text{O}_4$  NPs: (a) with the presence of SDBS; (b) without the addition of SDBS. Note that sample a is black in color, whereas sample b prepared without the presence of SDBS was grey green in color, clearly showing the affluent presence of  $\text{Co(OH)}_2$  species. Such comparative result indicates the role of SDBS in inhibiting the formation of  $\text{Co(OH)}_2$  during the process.

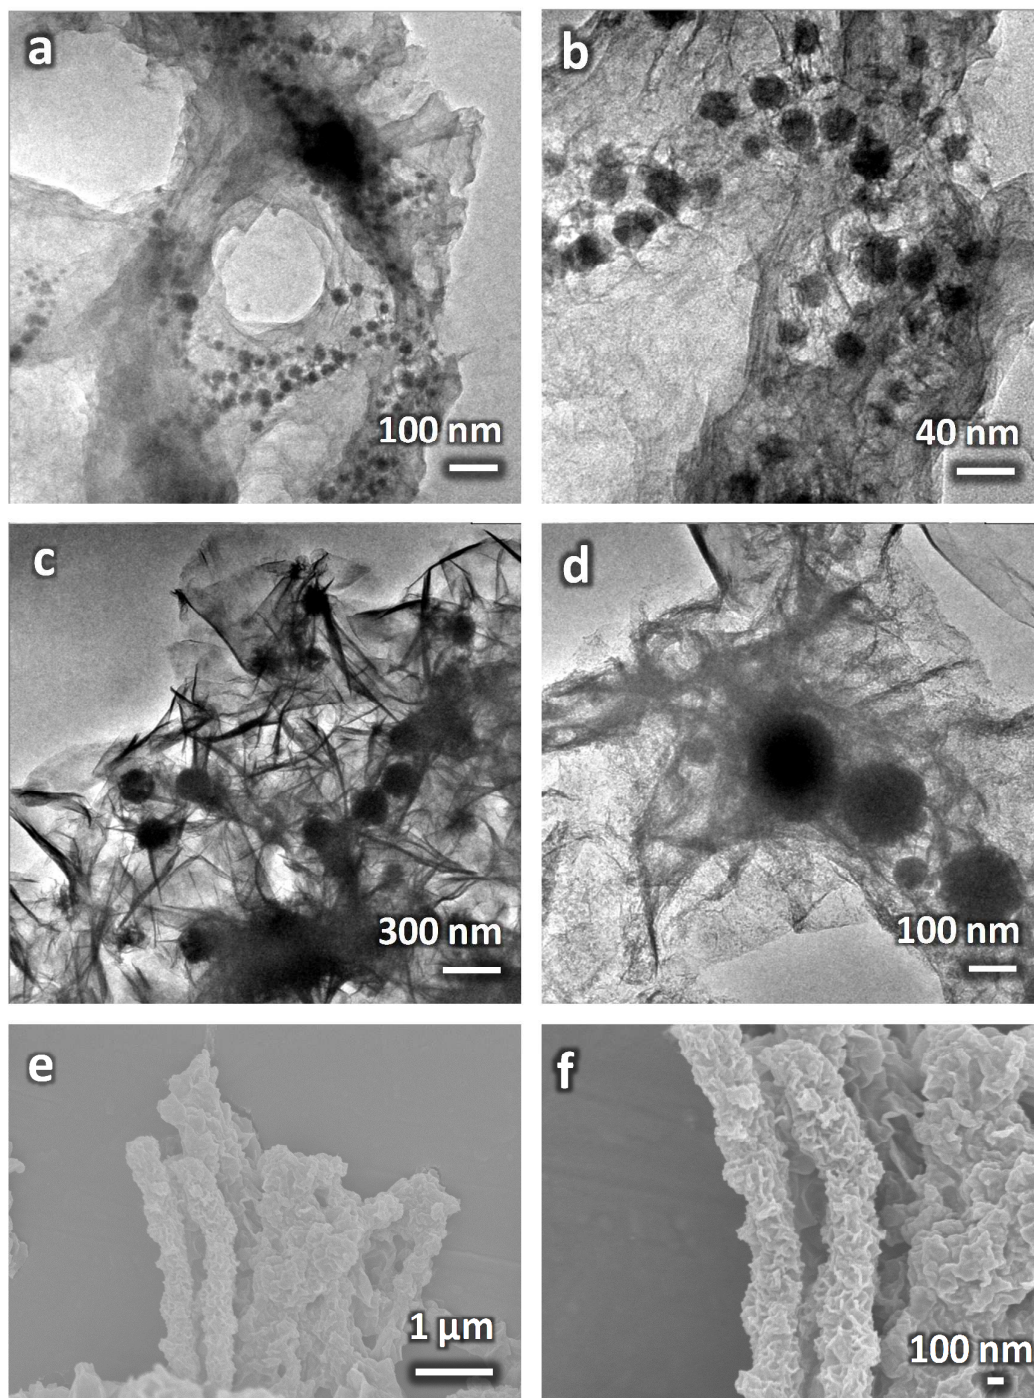

**Figure S5.** TEM images of: (a,b) the endproduct formed without the presence of the cylindrical magnet; (c,d) the endproduct formed when deionized water was used instead of the PVP aqueous solution; (e,f) the endproduct formed when a PVP concentration of 5% was employed. Note that other conditions are the same as those in the main text.

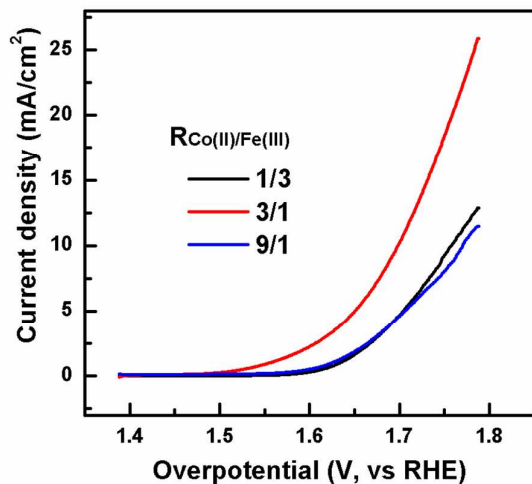

**Figure S6.** OER catalytic performance of the samples prepared using different ratios of Co(II) to Fe(III) in the precursor solution. Note that the samples were prepared using the conditions depicted in section 2.4 and the total mole of Co(II) and Fe(III) was maintained the same. The OER testing conditions: 0.1 M KOH, scan rate 5 mV/s.

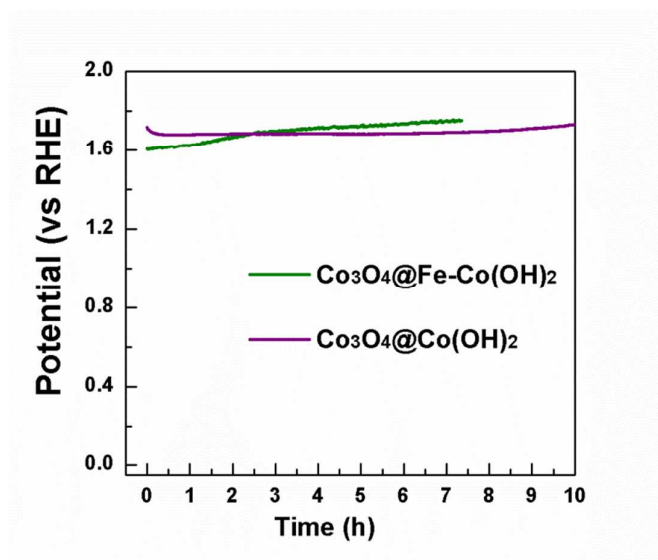

**Figure S7.** Durability test of the  $\text{Co}_3\text{O}_4@(\text{Fe-doped})\text{Co(OH)}_2$  microfibers in 0.1 M KOH by following the potential changes as a function of time at a current density of  $10 \text{ mA/cm}^2$ . The data was not iR-compensated.
